# Supplementary material for: Supramolecular porous ionic network based on triazinonide and imidazolium: a template-free synthesis of meso-/macroporous organic materials via a one-pot reaction-assembly procedure
Source: Royal Society of Chemistry journal article supplement (doi:10.1039/c6ra20590a), 2016-01-01
Supplement: c6ra20590a1.pdf [file c6ra20590a1.pdf]

## Supramolecular Porous Ionic Network based on Triazinonide and Imidazolium: A Template-Free Synthesis of Meso-/Macroporous Organic Materials *via* One-Pot Reaction-Assembly Procedure

Ze-Huan Hei<sup>a</sup>, Gan-Lin Song<sup>a</sup>, Chen-Yu Zhao<sup>a</sup>, Wenhao Fan<sup>b</sup>, Mu-Hua Huang<sup>a\*</sup>

<sup>a</sup>School of Materials Science and Engineering, Beijing Institute of Technology, Beijing, 100081, China. E-mail: mhhuang@bit.edu.cn

<sup>b</sup>BeijingCenter for Physical & Chemical Analysis, Beijing, 100089, China

**Table S1** Optimization of conditions for preparing SPIN-1

| Entry | Conc. of 2<br>(wt%) | Assembly<br>temp. <sup>a</sup> | Drying<br>temp. <sup>b</sup> | BET SA<br>/m <sup>2</sup> g <sup>-1</sup> | Pore volume/<br>cm <sup>3</sup> g <sup>-1</sup> |
|-------|---------------------|--------------------------------|------------------------------|-------------------------------------------|-------------------------------------------------|
| 1     | 50                  | r.t.                           | r.t.                         | 109                                       | 0.37                                            |
| 2     | 1.5                 | r.t.                           | r.t.                         | 263                                       | 0.75                                            |
| 3     | 1.5                 | r.t.                           | 85 °C                        | 152                                       | 0.52                                            |
| 4     | 1.5                 | 90 °C                          | r.t.                         | 154                                       | 0.53                                            |
| 5     | 1.5                 | -                              | r.t.                         | 40                                        | -                                               |

<sup>a</sup> The temperature for stirring the mixture with H<sub>2</sub>O before filtration. <sup>b</sup> The temperature to remove residual solvent from the materials

**Table S2** elemental analysis data of SPIN-1

| Entry | N %   | C %   | H %  |
|-------|-------|-------|------|
| 1     | 35.44 | 38.89 | 2.79 |
| 2     | 35.14 | 37.95 | 2.56 |

Table S3 Detailed data of N<sub>2</sub> adsorption @77 K for SPIN-1

| Relative Pressure<br>(P/P <sub>0</sub> ) | Absolute Pressure<br>(mmHg) | Quantity Adsorbed<br>(cm <sup>3</sup> /g STP) | Elapsed Time<br>(h:min) |
|------------------------------------------|-----------------------------|-----------------------------------------------|-------------------------|
| 0.010242                                 | 7.732513                    | 38.7151                                       | 1:37                    |
| 0.031932                                 | 24.10829                    | 48.5375                                       | 1:50                    |
| 0.06246                                  | 47.1544                     | 55.5282                                       | 2:00                    |
| 0.078441                                 | 59.21803                    | 58.2819                                       | 2:06                    |
| 0.099717                                 | 75.27944                    | 61.3333                                       | 2:11                    |
| 0.119923                                 | 90.53162                    | 63.9535                                       | 2:16                    |
| 0.140221                                 | 105.8537                    | 66.359                                        | 2:20                    |
| 0.160266                                 | 120.9846                    | 68.5959                                       | 2:23                    |
| 0.180083                                 | 135.9424                    | 70.6729                                       | 2:27                    |
| 0.200366                                 | 151.2527                    | 72.7528                                       | 2:30                    |
| 0.248982                                 | 187.9492                    | 77.3481                                       | 2:35                    |
| 0.301994                                 | 227.9634                    | 82.2574                                       | 2:39                    |
| 0.352644                                 | 266.1932                    | 87.0821                                       | 2:43                    |
| 0.400285                                 | 302.1511                    | 91.8038                                       | 2:47                    |
| 0.450284                                 | 339.8879                    | 97.0466                                       | 2:51                    |
| 0.500125                                 | 377.5048                    | 102.849                                       | 2:55                    |
| 0.550324                                 | 415.3896                    | 109.3978                                      | 3:00                    |
| 0.600081                                 | 452.9393                    | 116.9841                                      | 3:05                    |
| 0.650006                                 | 490.6293                    | 126.2219                                      | 3:12                    |
| 0.699548                                 | 528.0379                    | 137.8509                                      | 3:18                    |
| 0.748906                                 | 565.3143                    | 153.5114                                      | 3:26                    |
| 0.798006                                 | 602.4008                    | 176.2062                                      | 3:35                    |
| 0.821781                                 | 620.3693                    | 191.4688                                      | 3:43                    |
| 0.849481                                 | 641.3082                    | 214.9655                                      | 3:53                    |
| 0.874361                                 | 660.1256                    | 242.9178                                      | 4:05                    |
| 0.899235                                 | 678.9429                    | 279.0953                                      | 4:18                    |
| 0.924901                                 | 698.3634                    | 324.3227                                      | 4:32                    |
| 0.94955                                  | 717.0187                    | 373.0889                                      | 4:46                    |
| 0.973439                                 | 735.1016                    | 423.9927                                      | 5:00                    |
| 0.980158                                 | 740.2011                    | 439.8635                                      | 5:08                    |
| 0.989185                                 | 747.0919                    | 464.1947                                      | 5:19                    |
| 0.994322                                 | 751.0319                    | 483.1021                                      | 5:27                    |
| 0.981742                                 | 741.567                     | 471.1373                                      | 5:32                    |
| 0.964623                                 | 728.7021                    | 446.1716                                      | 5:41                    |
| 0.929704                                 | 702.4362                    | 399.8897                                      | 5:57                    |
| 0.907045                                 | 685.3986                    | 367.7256                                      | 6:09                    |
| 0.874841                                 | 661.1703                    | 321.0622                                      | 6:25                    |
| 0.844893                                 | 638.6322                    | 282.5447                                      | 6:40                    |
| 0.819383                                 | 619.431                     | 252.6718                                      | 6:53                    |
| 0.790568                                 | 597.7371                    | 221.3345                                      | 7:08                    |
| 0.760183                                 | 574.8385                    | 193.8828                                      | 7:21                    |

|          |          |          |      |
|----------|----------|----------|------|
| 0.732795 | 554.2667 | 175.2643 | 7:33 |
| 0.706503 | 534.491  | 161.4812 | 7:42 |
| 0.67756  | 512.6772 | 149.877  | 7:49 |
| 0.649267 | 491.3483 | 140.8419 | 7:56 |
| 0.620291 | 469.4741 | 133.3933 | 8:01 |
| 0.591972 | 448.092  | 127.2451 | 8:06 |
| 0.563225 | 426.3811 | 121.9509 | 8:11 |
| 0.534862 | 404.9468 | 117.3406 | 8:15 |
| 0.506268 | 383.3331 | 113.1775 | 8:19 |
| 0.477784 | 361.8079 | 109.3211 | 8:24 |
| 0.450054 | 340.8404 | 104.8319 | 8:28 |
| 0.419224 | 317.528  | 101.0743 | 8:33 |
| 0.392563 | 297.3548 | 98.3064  | 8:36 |
| 0.363765 | 275.56   | 95.5321  | 8:39 |
| 0.335279 | 254.0048 | 92.8774  | 8:43 |
| 0.306751 | 232.4135 | 90.2853  | 8:47 |
| 0.278414 | 210.9586 | 87.7432  | 8:50 |
| 0.250097 | 189.5193 | 85.2079  | 8:54 |
| 0.221719 | 168.0306 | 82.635   | 8:58 |
| 0.193326 | 146.5261 | 80.0433  | 9:02 |
| 0.16504  | 125.0988 | 77.3017  | 9:06 |
| 0.13658  | 103.5362 | 74.3706  | 9:10 |
| 0.108314 | 82.11855 | 71.1685  | 9:15 |
| 0.080039 | 60.68864 | 67.4409  | 9:20 |
| 0.050378 | 38.20435 | 62.4084  | 9:27 |
| 0.031058 | 23.55384 | 57.6317  | 9:36 |

Table S4 Detailed data of CO<sub>2</sub> adsorption @273 K for SPIN-1

| Absolute Pressure<br>(mmHg) | Quantity Adsorbed<br>(cm <sup>3</sup> /g STP) | Elapsed Time<br>(h:min) |
|-----------------------------|-----------------------------------------------|-------------------------|
| 54.76447                    | 5.5859                                        | 0:40                    |
| 112.9465                    | 8.7986                                        | 0:42                    |
| 163.8594                    | 10.9159                                       | 0:45                    |
| 199.4487                    | 12.2145                                       | 0:47                    |
| 249.7386                    | 13.8142                                       | 0:49                    |
| 299.89                      | 15.2178                                       | 0:51                    |
| 349.6315                    | 16.4948                                       | 0:53                    |
| 401.2186                    | 17.7187                                       | 0:56                    |
| 451.1563                    | 18.8244                                       | 0:59                    |
| 500.236                     | 19.8386                                       | 1:01                    |
| 549.6866                    | 20.8637                                       | 1:03                    |
| 600.7783                    | 21.8352                                       | 1:05                    |
| 650.3613                    | 22.7615                                       | 1:07                    |
| 700.4559                    | 23.6636                                       | 1:10                    |
| 759.8442                    | 24.6955                                       | 1:12                    |
| 686.3224                    | 23.6596                                       | 1:15                    |
| 636.0325                    | 22.9051                                       | 1:18                    |
| 586.1324                    | 22.1132                                       | 1:20                    |
| 550.7477                    | 21.5311                                       | 1:23                    |
| 501.346                     | 20.6401                                       | 1:26                    |
| 450.9756                    | 19.6331                                       | 1:28                    |
| 399.6597                    | 18.5429                                       | 1:30                    |
| 349.7033                    | 17.3881                                       | 1:33                    |
| 299.7186                    | 16.1128                                       | 1:35                    |
| 249.8139                    | 14.6942                                       | 1:38                    |
| 199.981                     | 13.1125                                       | 1:40                    |
| 150.0994                    | 11.2553                                       | 1:43                    |
| 100.1148                    | 9.0029                                        | 1:46                    |
| 50.31031                    | 5.9714                                        | 1:50                    |

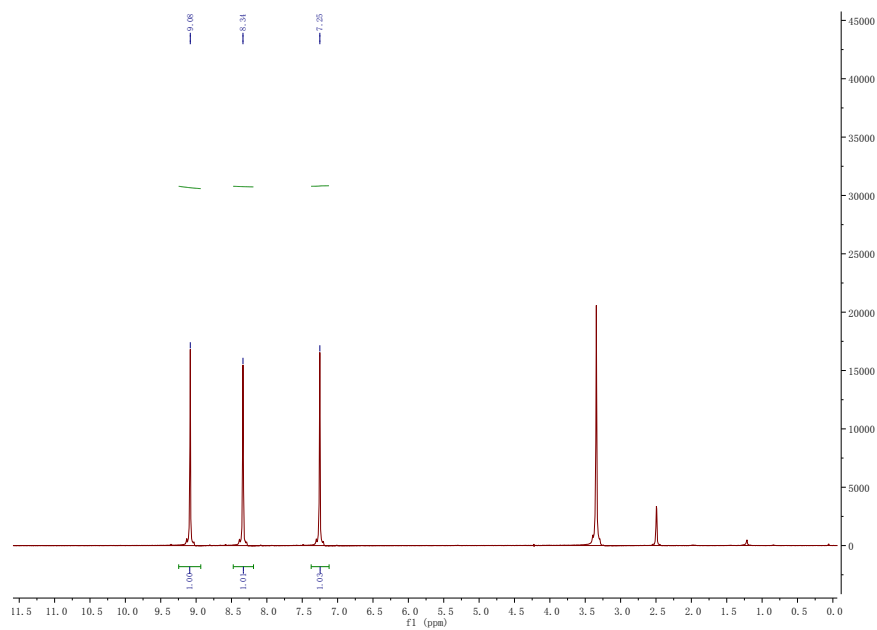

Figure S1  $^1\text{H-NMR}$  (in  $\text{DMSO-D}_6$ ) of compound 2

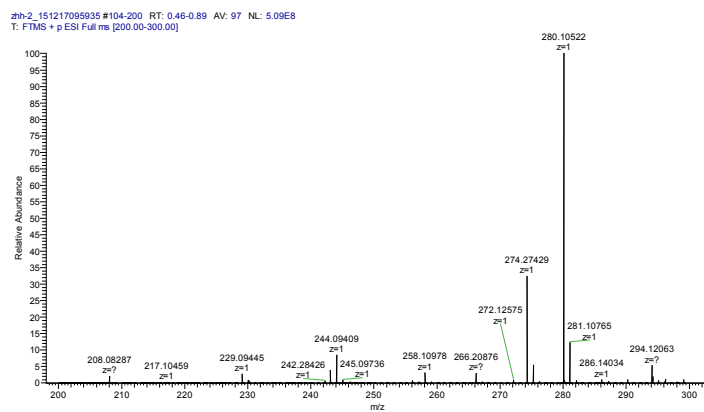

Figure S2 HR-MS of compound 2

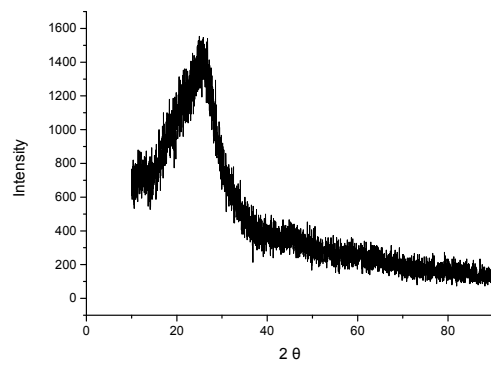

Figure S3 XRD pattern of SPIN-1

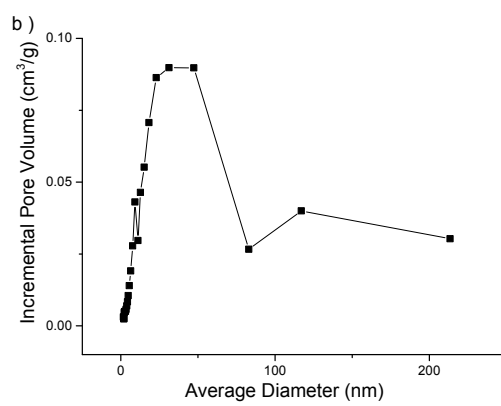

Figure S4 BJH analysis on SPIN-1
